# Supplementary material for: Intranasal Delivery of miR133b in a NEO100-Based Formulation Induces a Healing Response in Spinal Cord-Injured Mice
Source: MDPI journal article supplement (doi:10.3390/cells12060931), 2023-03-18
Supplement: s1 [file s1]

Supplemental data 1:

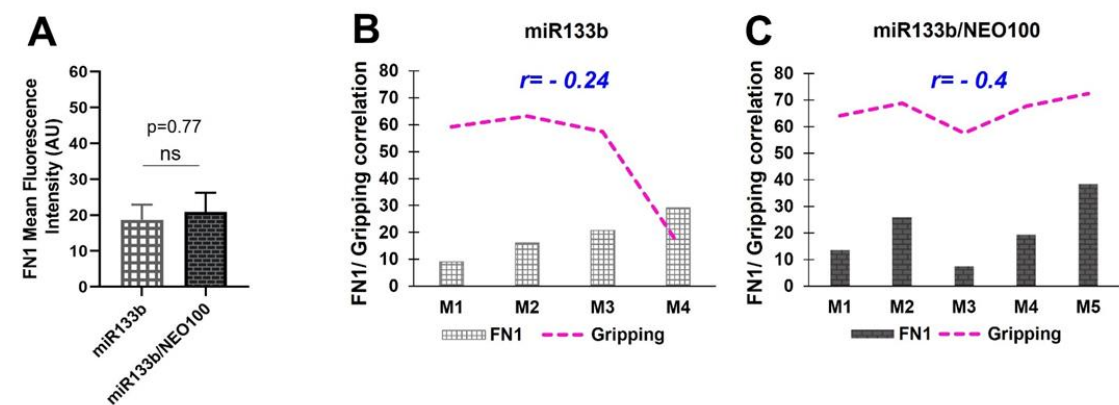

**Figure S1.** Panel A shows the level of FN1 expression at the lesion site in mice treated with miR133b/Ago2 alone versus miR133b/Ago2 with NEO100 at 56 days post-injury; t-test analysis. Panels B and C show the Pearson correlation coefficient between FN1 expression at the lesion and the forelimb gripping performance with both left and right forepaws at 56 days post-injury; confidence interval 95%. M= FN1 expression per mouse.

Supplemental data 2

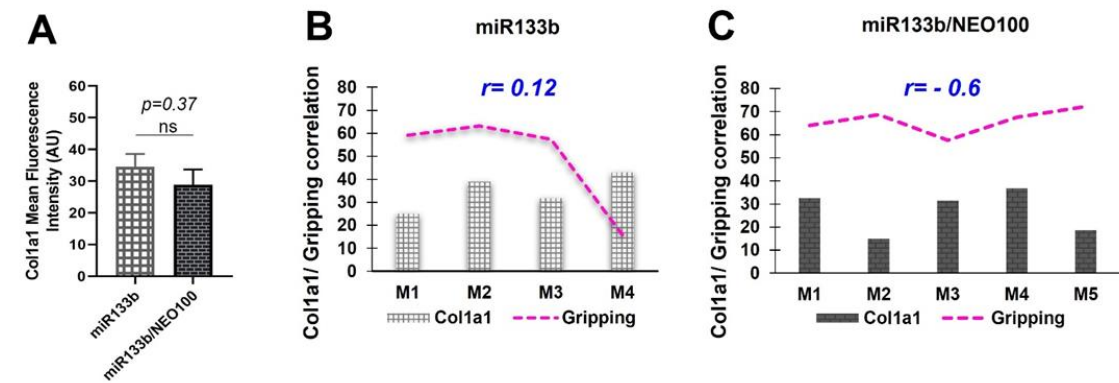

**Figure S2.** Panel A shows the level of Col1a1 expression at the lesion site in mice treated with miR133b/Ago2 alone versus miR133b/Ago2 with NEO100 at 56 days post-injury; t-test analysis. Panels B and C show the Pearson correlation coefficient between Col1a1 expression at the lesion and the forelimb gripping performance with both left and right forepaws at 56 days post-injury, confidence interval 95%. M= Col1a1 expression per mouse.
